# Supplementary material for: Evaluation of Storage Quality of Hardy Kiwifruit (Actinidia arguta): Effect of 1-MCP and Maturity Stage
Source: MDPI journal article supplement (doi:10.3390/agriculture12122062), 2022-12-01
Supplement: s1 [file s1]

Table S1. The multifactor analysis of variance (ANOVA) of firmness, soluble solids content (SSC) and titratable acidity (TA) of Ananasnaya fruit.

| Level of significance<br>( <i>p</i> -value) | Parameters |        |        |
|---------------------------------------------|------------|--------|--------|
|                                             | Firmness   | SSC    | TA     |
| A                                           | 0,0001     | 0,0001 | 0,0001 |
| B                                           | 0,0001     | 0,0001 | 0,0001 |
| C                                           | 0,0001     | 0,0001 | 0,0001 |
| D                                           | 0,0001     | 0,0001 | 0,0001 |
| AxB                                         | 0,4162     | 0,9611 | 0,0001 |
| AxC                                         | 0,0001     | 0,0001 | 0,0001 |
| AxD                                         | 0,0001     | 0,2228 | 0,0103 |
| BxC                                         | 0,0001     | 0,0001 | 0,0001 |
| BxD                                         | 0,0001     | 0,0001 | 0,0021 |
| CxD                                         | 0,0001     | 0,0001 | 0,0001 |
| AxBxC                                       | 0,0001     | 0,0171 | 0,1885 |
| BxCxD                                       | 0,0001     | 0,0001 | 0,0002 |
| AxCxD                                       | 0,0001     | 0,0094 | 0,1261 |
| AxBxCxD                                     | 0,0001     | 0,4375 | 0,0001 |

A – 1-MCP treatment; B – Harvest time; C – Technology of storage; D – Time of storage; SSC – Soluble solids content; TA – Titratable acidity.

Table S2. The multifactor analysis of variance (ANOVA) of firmness, soluble solids content (SSC) and titratable acidity (TA) of Geneva fruit.

| Level of significance<br>( <i>p</i> -value) | Parameters |        |        |
|---------------------------------------------|------------|--------|--------|
|                                             | Firmness   | SSC    | TA     |
| A                                           | 0,0001     | 0,0001 | 0,0001 |
| B                                           | 0,0001     | 0,0001 | 0,0001 |
| C                                           | 0,0001     | 0,0001 | 0,0001 |
| D                                           | 0,0001     | 0,0001 | 0,0001 |
| AxB                                         | 0,0001     | 0,0002 | 0,1470 |
| AxC                                         | 0,0001     | 0,0001 | 0,0001 |
| AxD                                         | 0,0001     | 0,0001 | 0,0001 |
| BxC                                         | 0,0001     | 0,0001 | 0,0001 |
| BxD                                         | 0,0001     | 0,0001 | 0,0001 |
| CxD                                         | 0,0001     | 0,0001 | 0,0001 |
| AxBxC                                       | 0,0056     | 0,0568 | 0,0427 |
| BxCxD                                       | 0,0001     | 0,0001 | 0,0001 |
| AxCxD                                       | 0,0001     | 0,0099 | 0,0001 |
| AxBxCxD                                     | 0,0001     | 0,0001 | 0,0063 |

A – 1-MCP treatment; B – Harvest time; C – Technology of storage; D – Time of storage; SSC – Soluble solids content; TA – Titratable acidity.
